# Supplementary material
Source: Royal Society of Chemistry journal article supplement (doi:10.1039/d6tc00896h)
Supplement: d6tc00896h1.pdf [file d6tc00896h1.pdf]

## Supporting Information

### ***Nitrogen-Doped Hollow Carbon Microcubes Modified by in-Situ Catalytic Growth CNTs for Broadband Microwave Absorption***

Dongwei Xu<sup>a,b\*</sup>, Zhihao Shen<sup>a</sup>, Duo Chen<sup>a,b</sup>, Hairong Chu<sup>c</sup>, Xuhai Xiong<sup>d</sup>, Ping Chen<sup>e\*</sup>

- a. School of Material Science and Engineering, Henan Key Laboratory of Aeronautical Materials and Application Technology, Zhengzhou University of Aeronautics, Zhengzhou, Henan 450046, China
- b. Collaborative Innovation Center of Processing and Detecting for Aerospace High Performance Materials, Zhengzhou, Henan 450046, China
- c. AECC Beijing Institute of Aeronautical Materials, Beijing 100095, China
- d. Liaoning Key Laboratory of Advanced Polymer Matrix Composites, Shenyang Aerospace University, Shenyang, 110136, China
- e. State Key Laboratory of Fine Chemicals, Dalian University of Technology, Dalian, 116024, China

\* Corresponding author:

Ping Chen, E-mail: chenping\_898@126.com

Dongwei Xu, E-mail: xudongwei1029@126.com

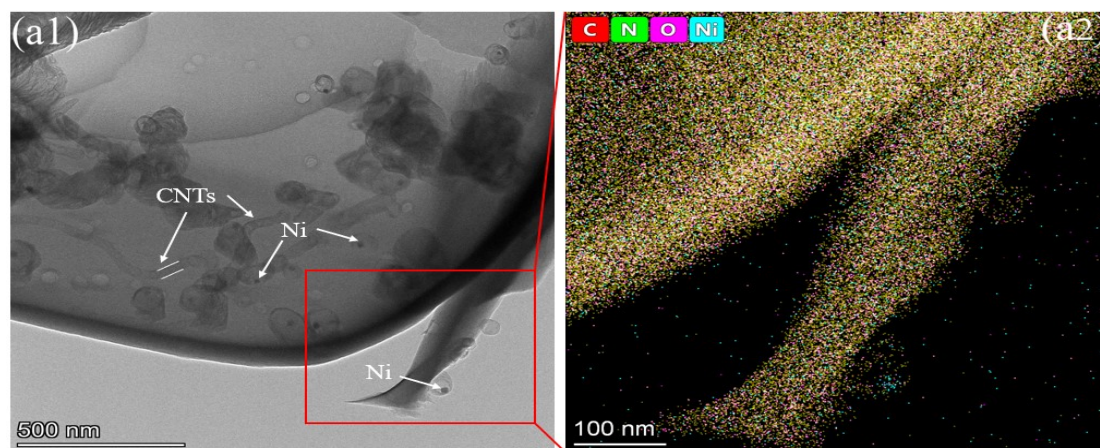

**Fig.S1.** TEM images of Ni@CNTs/N-HCMs

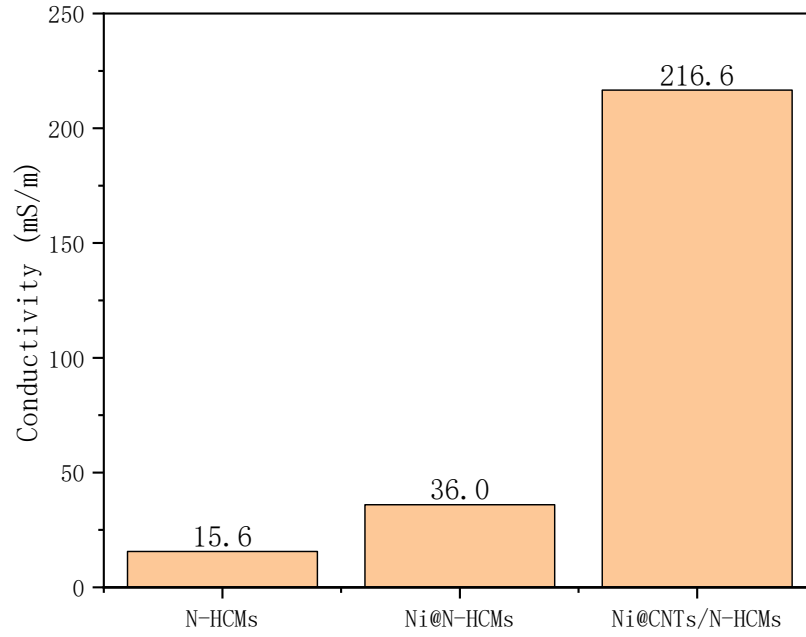

Fig.S2. Conductivity of Ni@N-HCMs, Ni@N-HCMs and Ni@CNTs@N-HCMs

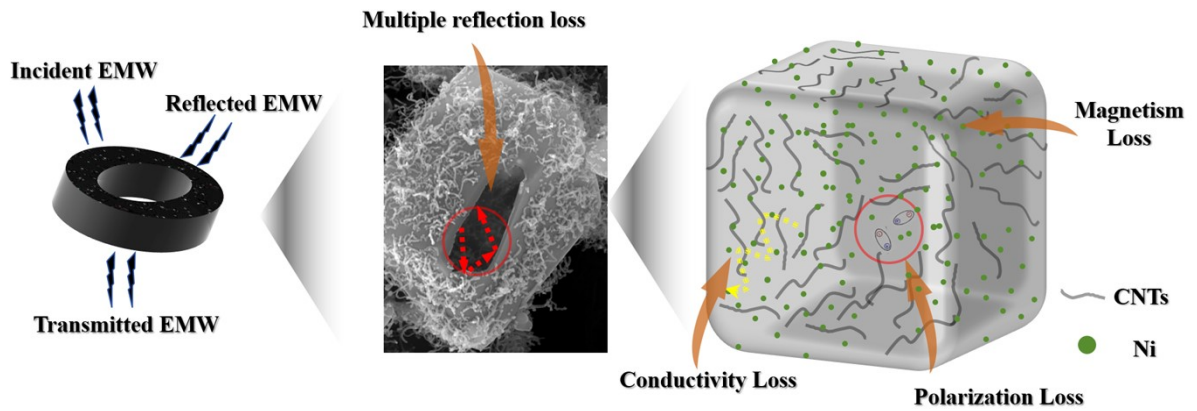

Fig.S3. Schematic diagram of the microwave absorption mechanism
